# Supplementary material for: Refining epigenetic prediction of chronological and biological age
Source: PubMed Central journal article supplement (PMC9976489; doi:10.1186/s13073-023-01161-y), 2023-02-28

## Supplementary Figures

**Figure S1.** Manhattan plots of (a) linear and (b) quadratic age EWAS in Generation Scotland. Dashed line indicates epigenome-wide significant level of  $p = 3.6 \times 10^{-8}$ . Genomic position indicated in x-axis, with  $-\log_{10}(p\text{-value})$  of association indicated in y-axis.  $p$ -values capped at  $10^{-320}$ .

(a)

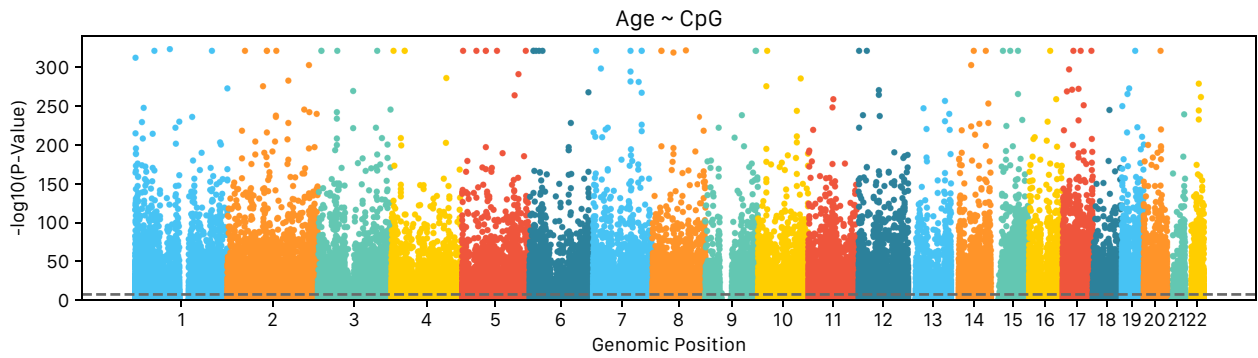

(b)

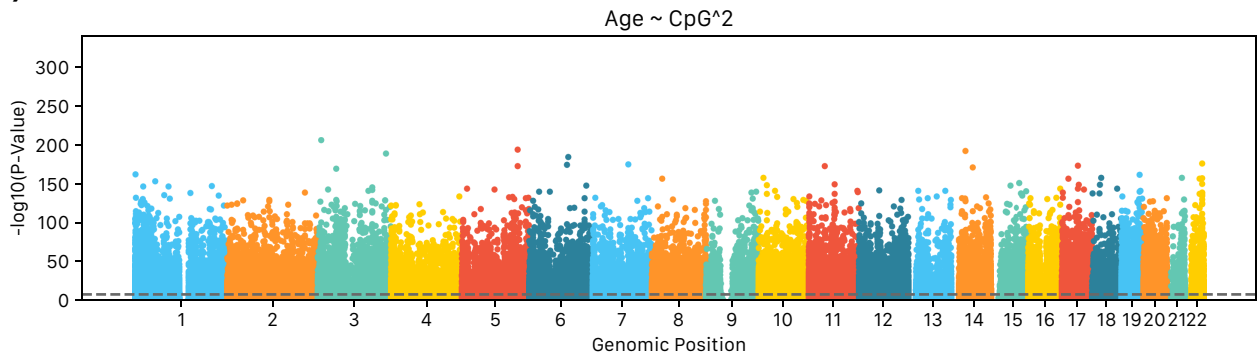

**Figure S2.** Scatterplots of top 15 associations from age ~ CpG EWAS. CpG beta values uncorrected for covariates (y-axis) are plotted against age (x-axis) for an unrelated subset of Generation Scotland participants (N = 4,450). LOESS curve with 95% confidence interval and contour plot overlaid. Gene names are taken from the Illumina EPIC array annotation file.

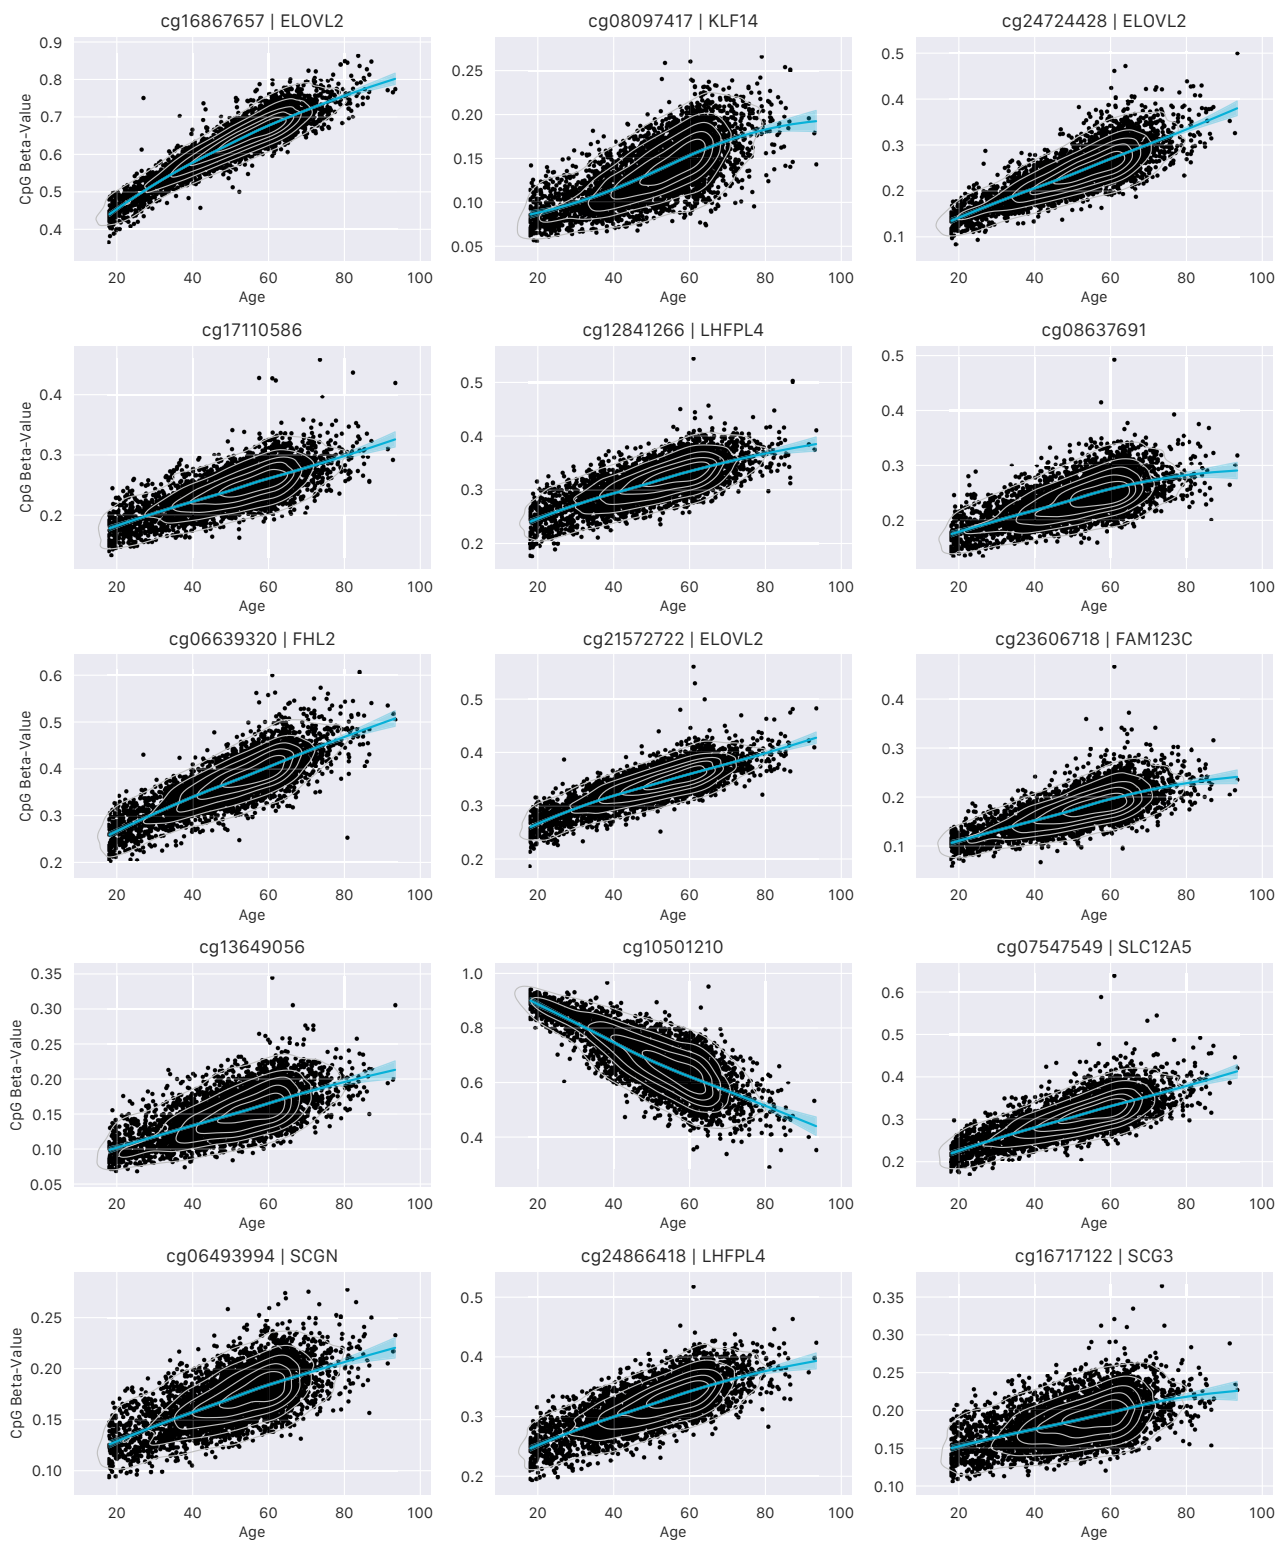

**Figure S3.** Scatterplots of top 15 associations from the age  $\sim$  CpG + CpG<sup>2</sup> EWAS. Significant associations are based on p-values obtained for the regression coefficient associated to CpG<sup>2</sup>. CpG beta values uncorrected for covariates (y-axis) are plotted against age (x-axis) for an unrelated subset of Generation Scotland participants (N = 4,450). LOESS curve with 95% confidence interval and contour plot overlaid. Gene names are taken from the Illumina EPIC array annotation file.

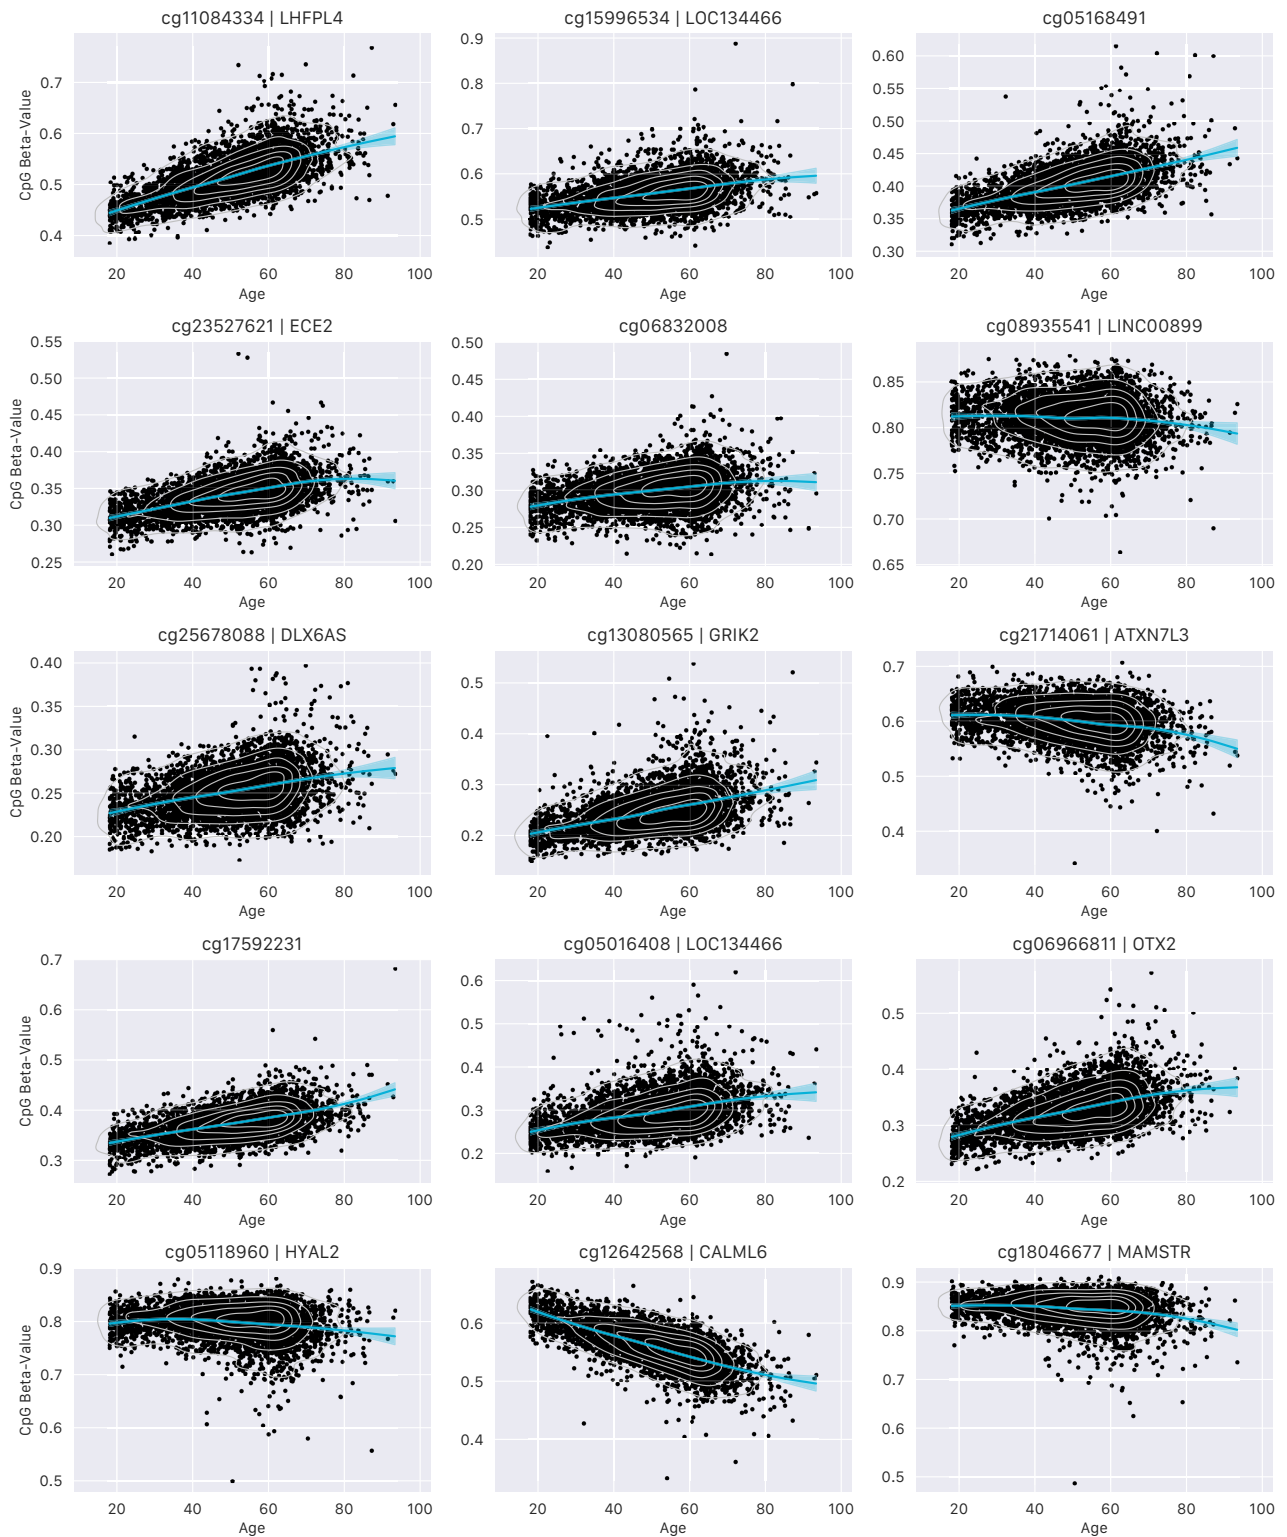

**Figure S4.** Manhattan plot of all-cause mortality EWAS in Generation Scotland. Dashed line indicates epigenome-wide significant level of  $p = 3.6 \times 10^{-8}$ . Genomic position indicated in x-axis, with  $-\log_{10}(p\text{-value})$  of association indicated in y-axis.

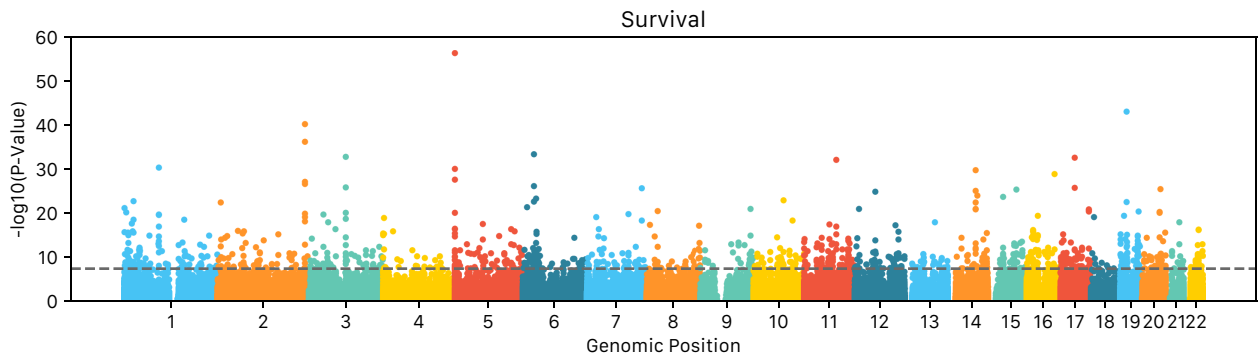

**Figure S5.** Comparison of Z-values for 200 overlapping epigenome-wide significant CpG-mortality associations reported by Colicino et al<sup>4</sup>, and those considered in the present study (Pearson correlation,  $r$ ). The grey line shows  $y = x$  (perfect correspondence). The correlations for the subset of findings from Colicino et al. with  $Z > 0$  and  $Z < 0$  are 0.29 and 0.46, respectively.

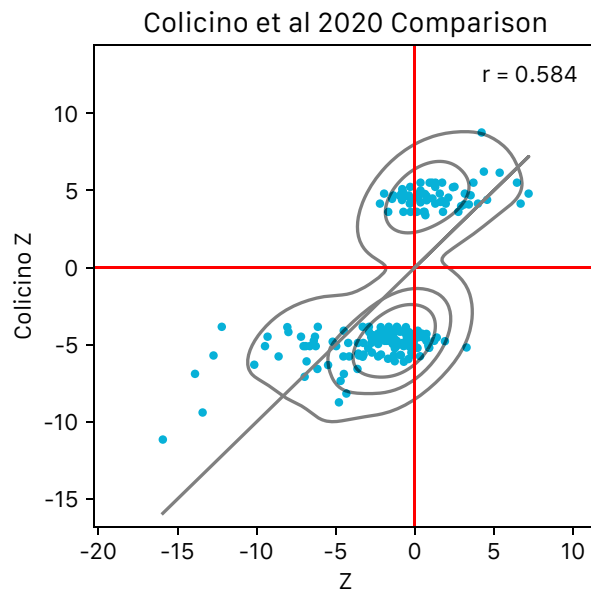

**Figure S6.** Prediction metrics (Pearson correlation -  $r$ , root mean square error - RMSE, and median absolute error - MAE) for GSE40279, as a function of CpGs included in training of a cAge predictor, trained using Generation Scotland data. CpG subsets obtained from linear age EWAS in Generation Scotland.

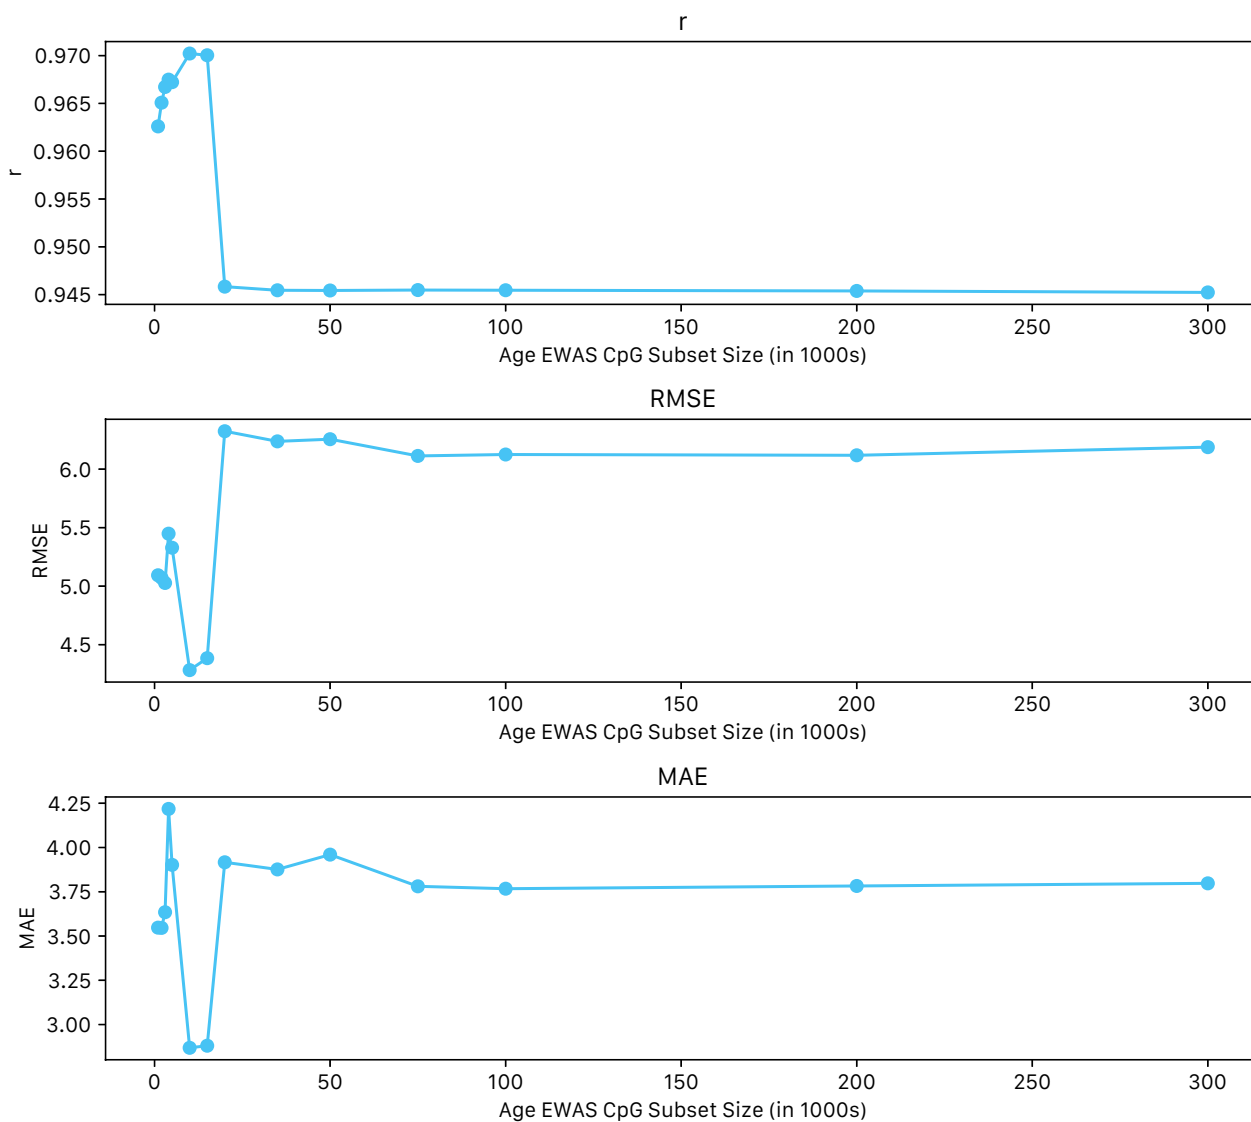

**Figure S7.** Prediction metrics (Pearson correlation -  $r$ , root mean square error - RMSE, and median absolute error - MAE) for GSE40279, as a function of CpG<sup>2</sup>s included in training of a cAge predictor trained using Generation Scotland data, in addition to top 10K age-associated CpGs. CpG<sup>2</sup> subsets obtained from quadratic age EWAS in Generation Scotland.

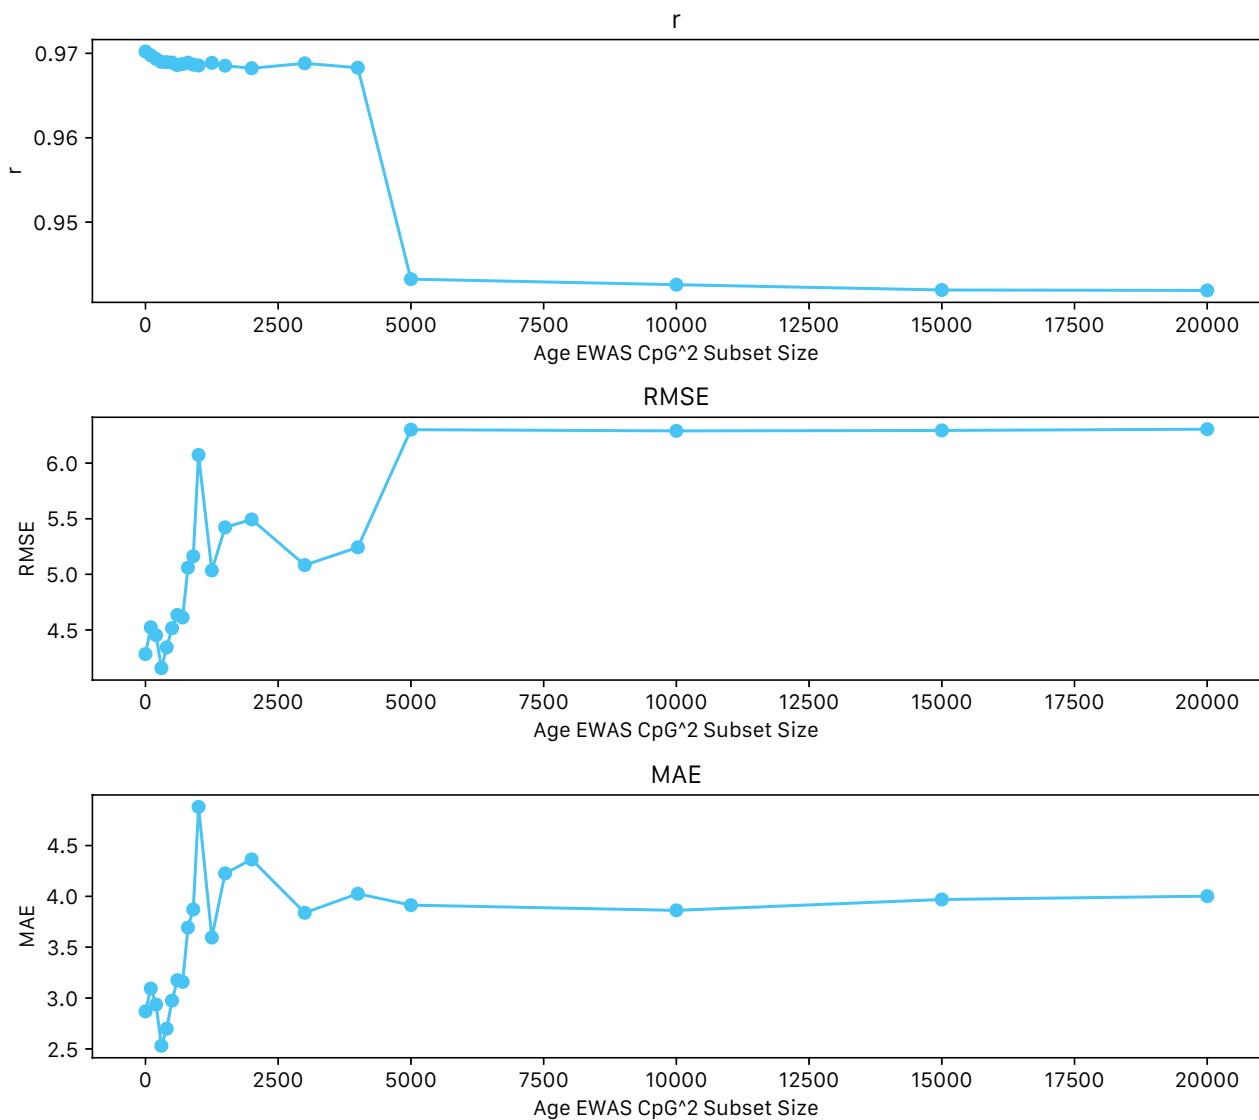

**Figure S8.** cAge predictor median absolute error (MAE)  $\pm$  1.96 its standard deviation on 10 external testing datasets, as a function of age, in 10 year intervals.

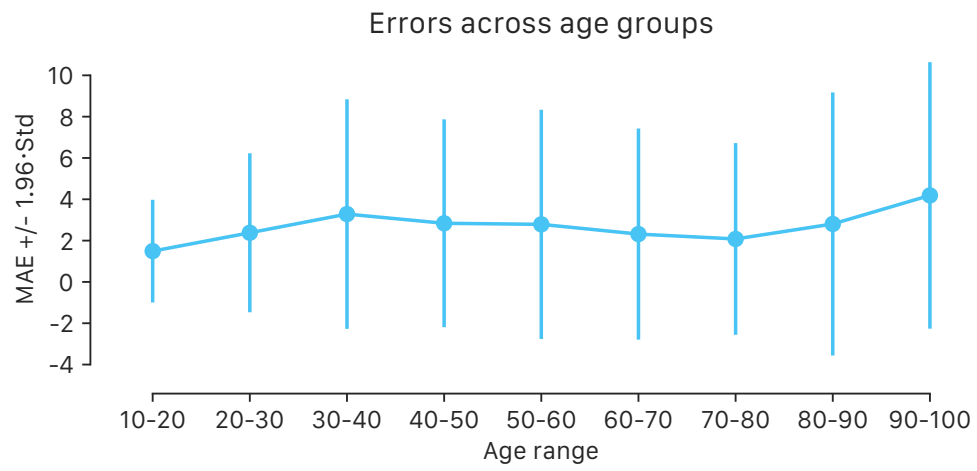



**Figure S9.** Forest plots of bAge, GrimAge, PhenoAge, and DunedinPACE predictors, applied to all-cause mortality in LBC1921 and LBC1936. Predictors regressed on age to obtain age acceleration residuals (AgeAccel). Hazard ratios are presented per standard deviation of the predictor variables, along with 95% confidence intervals. Cox models are adjusted for age at DNAm sampling and sex.

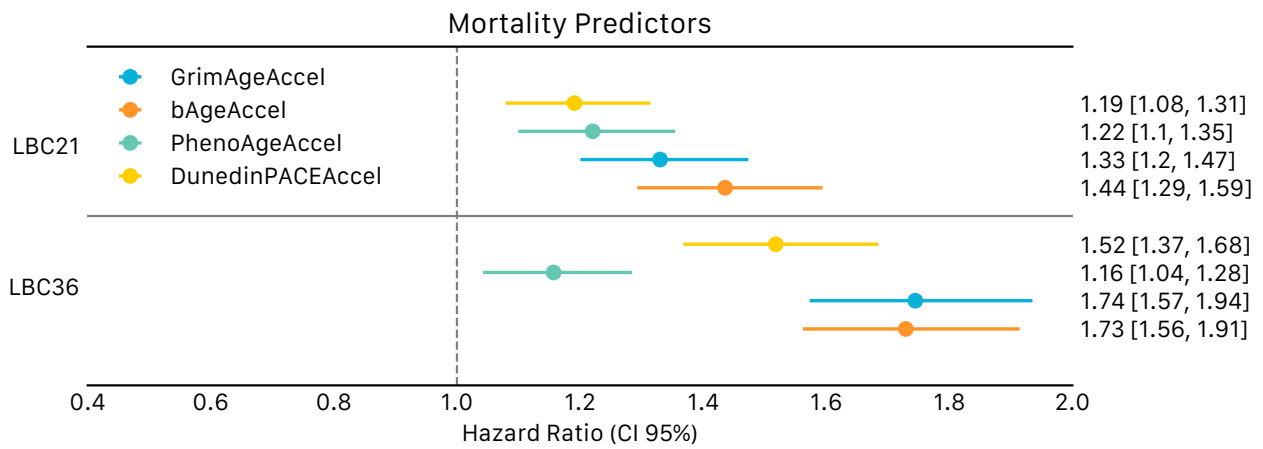

Supplement: 13073_2023_1161_MOESM3_ESM.pdf [file 13073_2023_1161_MOESM3_ESM.pdf]
